# Supplementary material for: Controllable synthesis of nitrogen-doped carbon nanobubbles to realize high-performance lithium and sodium storage
Source: Royal Society of Chemistry journal article supplement (doi:10.1039/d0dt03258a), 2020-01-01
Supplement: d0dt03258a1.pdf [file d0dt03258a1.pdf]

*Electronic Supporting Information*

**Controllable synthesis of nitrogen-doped carbon nanobubbles to realize high-performance for lithium and sodium storage**

Lin Sun,<sup>1,2,3</sup> Jie Xie,<sup>b</sup> Xixi Zhang,<sup>b</sup> Lei Zhang,<sup>b</sup> Jun Wu,<sup>b</sup> Rong Shao,<sup>b</sup> Ruiyu Jiang,<sup>b</sup> and Zhong Jin <sup>\*c</sup>

<sup>1</sup> *School of Chemistry and Chemical Engineering, Jiangsu Collaborative Innovation Center for Ecological Building Materials and Environmental Protection Equipments, Yancheng Institute of Technology, Yancheng, 224051, China*

<sup>2</sup> *Key Laboratory of Mesoscopic Chemistry of MOE, School of Chemistry and Chemical Engineering, Nanjing University, Nanjing, 210023, China*

<sup>3</sup> *School of Petrochemical Engineering, Changzhou University, Changzhou, 213164, China*

***Electronic Supplementary Information contains Fig. S1-S6 and Table S1-S3.***

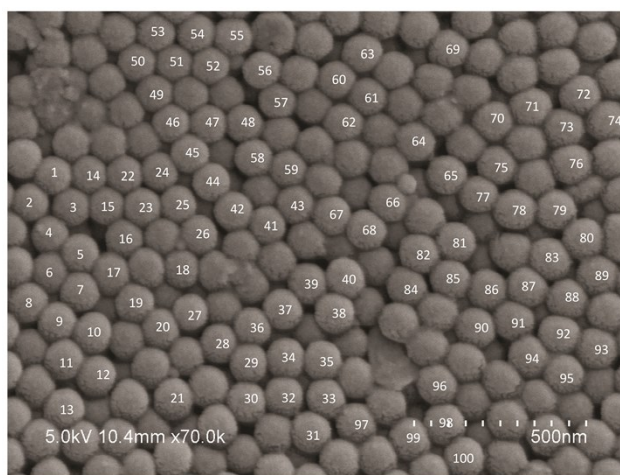

Fig. S1 SEM image of PS spheres and the randomly selected 100 particles.

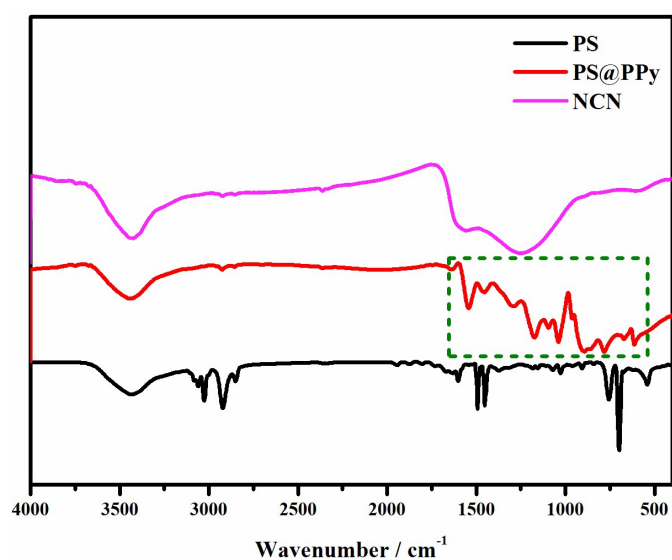

Fig. S2 FTIR spectrum of PS, PS@PPy, PS@PPy with THF washing, and NCN, respectively.

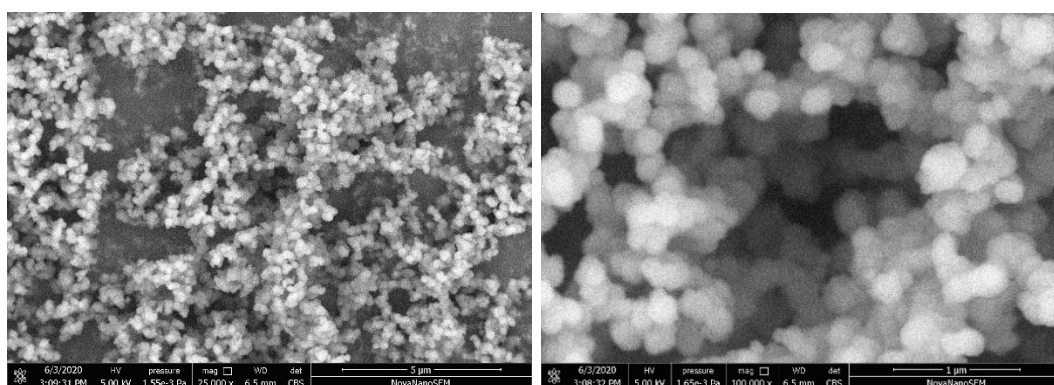

Fig. S3 SEM images of PPy-C at different magnifications.

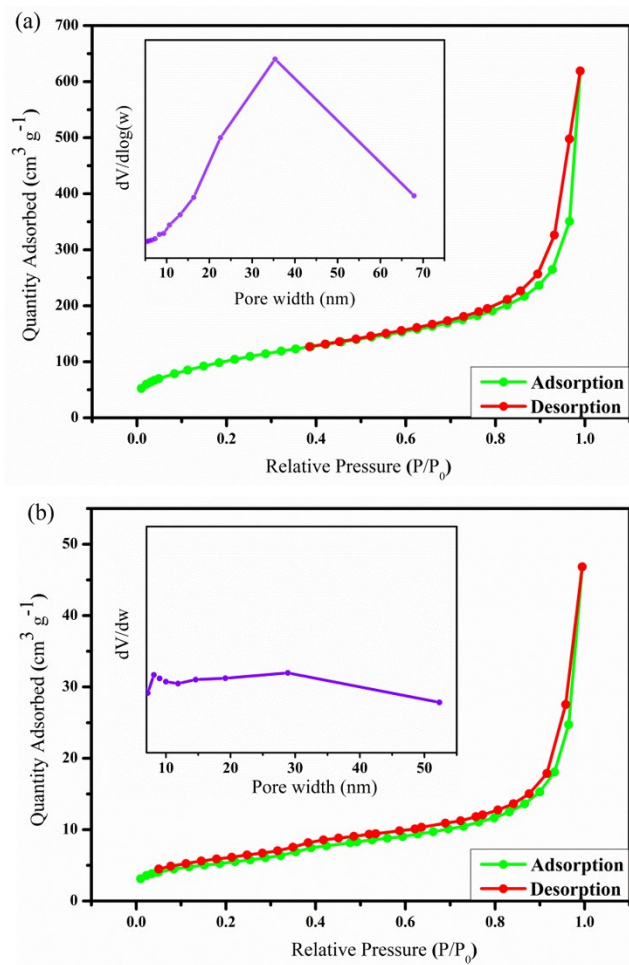

Fig. S4 Nitrogen sorption isotherms and pore distributions of (a) NCN and (b) PPy-C.

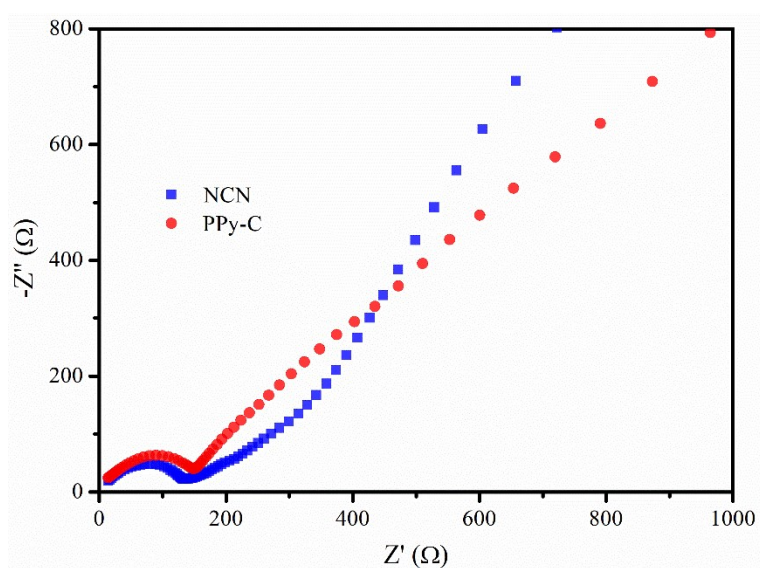

Fig. S5 Nyquist plots of NCN and PPy-C electrode before testing.

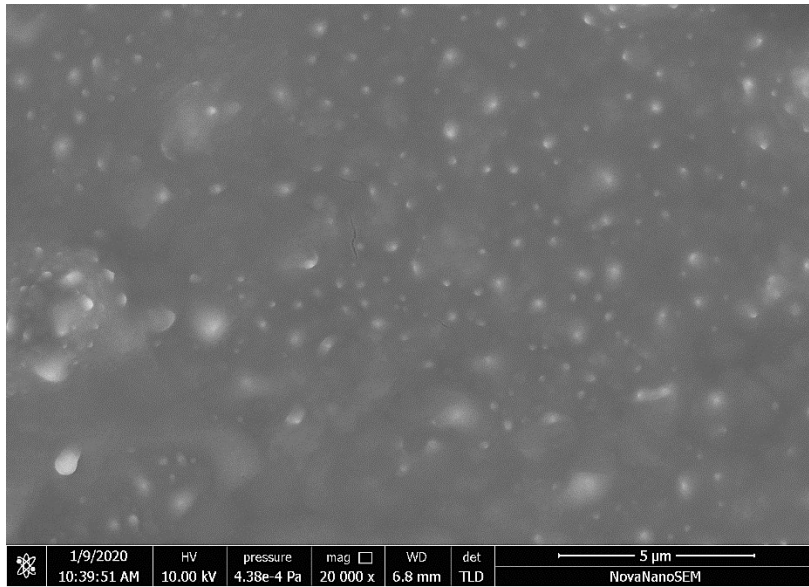

Fig. S6 SEM image of NCN electrode after charging-discharging for 1000 cycles.

**Table S1.** Size statistics of PS nanospheres based on 100 selected particles

| <b>NO.</b> | <b>Particle size (nm)</b> |
|------------|---------------------------|------------|---------------------------|------------|---------------------------|------------|---------------------------|
| 1          | 108.3                     | 26         | 103.7                     | 51         | 103.7                     | 76         | 115.2                     |
| 2          | 110.6                     | 27         | 103.7                     | 52         | 108.3                     | 77         | 106.0                     |
| 3          | 106.0                     | 28         | 110.6                     | 53         | 101.4                     | 78         | 119.8                     |
| 4          | 106.0                     | 29         | 110.6                     | 54         | 108.3                     | 79         | 112.9                     |
| 5          | 106.0                     | 30         | 115.2                     | 55         | 110.6                     | 80         | 115.2                     |
| 6          | 103.7                     | 31         | 110.6                     | 56         | 110.6                     | 81         | 117.5                     |
| 7          | 112.9                     | 32         | 110.6                     | 57         | 103.7                     | 82         | 117.5                     |
| 8          | 112.9                     | 33         | 110.6                     | 58         | 106.0                     | 83         | 119.8                     |
| 9          | 108.3                     | 34         | 112.9                     | 59         | 103.7                     | 84         | 112.9                     |
| 10         | 112.9                     | 35         | 110.6                     | 60         | 106.0                     | 85         | 110.6                     |
| 11         | 106.0                     | 36         | 117.5                     | 61         | 106.0                     | 86         | 110.6                     |
| 12         | 115.2                     | 37         | 117.5                     | 62         | 110.6                     | 87         | 117.5                     |
| 13         | 117.5                     | 38         | 112.9                     | 63         | 106.0                     | 88         | 115.2                     |
| 14         | 103.7                     | 39         | 115.2                     | 64         | 110.6                     | 89         | 110.6                     |
| 15         | 101.4                     | 40         | 122.1                     | 65         | 108.3                     | 90         | 115.2                     |
| 16         | 106.0                     | 41         | 106.0                     | 66         | 112.9                     | 91         | 110.6                     |
| 17         | 117.5                     | 42         | 108.3                     | 67         | 108.3                     | 92         | 117.5                     |
| 18         | 103.7                     | 43         | 106.0                     | 68         | 117.5                     | 93         | 122.1                     |
| 19         | 110.6                     | 44         | 108.3                     | 69         | 108.3                     | 94         | 115.2                     |
| 20         | 112.9                     | 45         | 106.0                     | 70         | 112.9                     | 95         | 115.2                     |
| 21         | 110.6                     | 46         | 106.0                     | 71         | 108.3                     | 96         | 115.2                     |
| 22         | 99.1                      | 47         | 108.3                     | 72         | 119.8                     | 97         | 115.2                     |
| 23         | 103.7                     | 48         | 103.7                     | 73         | 115.2                     | 98         | 119.8                     |
| 24         | 106.0                     | 49         | 106.0                     | 74         | 115.2                     | 99         | 119.8                     |
| 25         | 96.8                      | 50         | 106.0                     | 75         | 112.9                     | 100        | 112.9                     |

**Table S2.** Comparison of the electrochemical performance of carbon-based anodes for LIBs

| Samples                                | Cycle performance                                          | ICE (%) | Ref.      |
|----------------------------------------|------------------------------------------------------------|---------|-----------|
| N-doped porous carbon                  | 1105 mA h g <sup>-1</sup> (100th) / 1 A g <sup>-1</sup>    | 62      | 1         |
| Carbon nanofiber                       | 391 mA h g <sup>-1</sup> (1000th) / 10 A g <sup>-1</sup>   | 53      | 2         |
| N-doped porous hard carbon             | 673 mA h g <sup>-1</sup> (100th) / 0.05 A g <sup>-1</sup>  | 58      | 3         |
| Seaweed-derived carbon                 | 348 mA h g <sup>-1</sup> (3000th) / 5 A g <sup>-1</sup>    | 67      | 4         |
| Porous carbon                          | 335.9 mA h g <sup>-1</sup> (1000th) / 0.1 C                | 51      | 5         |
| Oxygen-riched porous carbon nanosheets | 742.8 mA h g <sup>-1</sup> (100th) / 0.1 A g <sup>-1</sup> | 80      | 6         |
| N-rich carbon nanotubes                | 343 mA h g <sup>-1</sup> (1800th) / 1 A g <sup>-1</sup>    | 68      | 7         |
| Porous carbon                          | 900 mA h g <sup>-1</sup> (100th) / 0.1 A g <sup>-1</sup>   | 47      | 8         |
| Honeycomb-like carbon                  | 609 mA h g <sup>-1</sup> (500th) / 1 A g <sup>-1</sup>     | 45      | 9         |
| P-doped mesoporous carbon              | 180 mA h g <sup>-1</sup> (10000th) / 10 A g <sup>-1</sup>  | 49      | 10        |
| S-doped mesoporous carbon              | 250 mA h g <sup>-1</sup> (500th) / 0.2 A g <sup>-1</sup>   | 61      | 11        |
| Petroleum coke derived porous carbon   | 407 mA h g <sup>-1</sup> (500th) / 3.72 A g <sup>-1</sup>  | 52      | 12        |
| N/S co-doped carbon                    | 653 mA h g <sup>-1</sup> (500th) / 5 A g <sup>-1</sup>     | 75      | 13        |
| N/P co-doped carbon                    | 740 mA h g <sup>-1</sup> (2000th) / 2 A g <sup>-1</sup>    | 74      | 14        |
| CO <sub>2</sub> derived porous carbon  | 630 mA h g <sup>-1</sup> (200th) / 0.2 A g <sup>-1</sup>   | 37      | 15        |
| Pomegranate-like porous carbon         | 650 mA h g <sup>-1</sup> (500th) / 0.2 A g <sup>-1</sup>   | 91      | 16        |
| N-doped porous carbon                  | 500 mA h g <sup>-1</sup> (500th) / 0.1 A g <sup>-1</sup>   | 67      | 17        |
| N-doped porous carbon                  | 799 mA h g <sup>-1</sup> (385th) / 0.8 A g <sup>-1</sup>   | 80      | This work |

**Table S3.** Comparison of the electrochemical performance of carbon-based anodes for SIBs

| Samples                        | Cycle performance                                         | ICE (%) | Ref.      |
|--------------------------------|-----------------------------------------------------------|---------|-----------|
| N-doped porous carbon          | 242 mA h g <sup>-1</sup> (2500th) / 1 A g <sup>-1</sup>   | 25      | 18        |
| N/S co-doped mesoporous carbon | 247 mA h g <sup>-1</sup> (600th) / 0.5 A g <sup>-1</sup>  | 22      | 19        |
| Aurilave-like carbon           | 107 mA h g <sup>-1</sup> (1000th) / 2 A g <sup>-1</sup>   | 42      | 20        |
| Hard carbon                    | 80 mA h g <sup>-1</sup> (600th) / 0.1 A g <sup>-1</sup>   | 66      | 21        |
| S/P co-doped carbon            | 290 mA h g <sup>-1</sup> (1000th) / 1 A g <sup>-1</sup>   | 54      | 22        |
| Porous hard carbon             | 100 mA h g <sup>-1</sup> (3000th) / 5 A g <sup>-1</sup>   | 77      | 23        |
| P-doped hard carbon            | 210 mA h g <sup>-1</sup> (3000th) / 0.3 A g <sup>-1</sup> | 72      | 24        |
| Hard carbon microsphere        | 186 mA h g <sup>-1</sup> (250th) / 0.4 C                  | 88      | 25        |
| N/P co-doped carbon            | 260 mA h g <sup>-1</sup> (150th) / 0.1 A g <sup>-1</sup>  | 76      | 26        |
| Lignin-derived hard carbon     | 280 mA h g <sup>-1</sup> (250th) / 0.2 A g <sup>-1</sup>  | 71      | 27        |
| Carbon nanosheets              | 309 mA h g <sup>-1</sup> (200th) / 0.2 A g <sup>-1</sup>  | 58      | 28        |
| S-doped carbon                 | 290 mA h g <sup>-1</sup> (100th) / 1 A g <sup>-1</sup>    | 47      | 29        |
| Carbon nanocups                | 212 mA h g <sup>-1</sup> (1000th) / 1.5 A g <sup>-1</sup> | 34      | 30        |
| N/S co-doped carbon            | 75 mA h g <sup>-1</sup> (10000th) / 5 A g <sup>-1</sup>   | 34      | 31        |
| Porous carbon sheets           | 110 mA h g <sup>-1</sup> (500th) / 0.5 A g <sup>-1</sup>  | -       | 32        |
| N-doped porous carbon          | 248 mA h g <sup>-1</sup> (200th) / 0.3 A g <sup>-1</sup>  | 79      | This work |

## References

- 1 J. Ou, L. Zou, F. Jin, S. Wu and J. Wang, *Powder Technol.*, 2020, **371**, 64-73.
- 2 J. Hu, Z. Xu, X. Li, S. Liang, Y. Chen, L. Lyu, H. Yao, Z. Lu and L. Zhou, *J. Power Sources*, 2020, **462**, 228098.
- 3 R. Li, J. Huang, J. Li, L. Cao, X. Zhong, A. Yu and G. Lu, *J. Electroanal. Chem.*, 2020, **862**, 114044.
- 4 H. Ouyang, Y. Ma, Q. Gong, C. Li, J. Huang, Z. Xu and B. Wei, *J. Alloys Compd.*, 2020, **823**, 153862.
- 5 P. Chen, Y. Fan, Y. Gao, Q. Liu, Y. Sun, T. Guo, B. Huang, X. Wang and Y. Fu, *Ind. Eng. Chem. Res.*, 2020, **59**, 11475-11484.
- 6 Y. Liu, M. Shi, M. Han, J. Yang, J. Yu, M. Narayanasamy, K. Dai, S. Angaiah and C. Yan, *Chem. Eng. J.*, 2020, **387**, 124104.
- 7 S. Zhong, H. Liu, D. Wei, J. Hu, H. Zhang, H. Hou, M. Peng, G. Zhang and H. Duan, *Chem. Eng. J.*, 2020, **395**, 125054.
- 8 D. Qiu, C. Kang, M. Li, J. Wei, Z. Hou, F. Wang and R. Yang, *Carbon*, 2020, **162**, 595-603.
- 9 X. Han, L. Sun, F. Wang and D. Sun, *J. Mater. Chem. A*, 2018, **6**, 18891-18897.
- 10 J. Wang, Y. Xia, Y. Liu, W. Li and D. Zhao, *Energy Storage Mater.*, 2019, **22**, 147-153.
- 11 Y. Lu, Q. Zhang, S. Lei, X. Cui, S. Deng and Y. Yang, *ACS Applied Energy Mater.*, 2019, **2**, 5591-5599.
- 12 P. Li, J.-Y. Hwang, S.-M. Park and Y.-K. Sun, *J. Mater. Chem. A*, 2018, **6**, 12551-12558.
- 13 Z. Qiu, Y. Lin, H. Xin, P. Han, D. Li, B. Yang, P. Li, S. Ullah, H. Fan, C. Zhu and J. Xu, *Carbon*, 2018, **126**, 85-92.
- 14 C. Ma, C. Deng, X. Liao, Y. He, Z. Ma and H. Xiong, *ACS Appl. Mater. Interfaces*, 2018, **10**, 36969-36975.
- 15 K. Wang, G. Feng, C. Liang, Y. Xia, J. Zhang, Y. Gan, H. Huang, X. Tao and W. Zhang, *ACS Appl. Energy Mater.*, 2018, **1**, 7123-7129.
- 16 L. Zhang, Y. Dou, H. Guo, B. Zhang, X. Liu, M. Wan, W. Li, X. Hu, S. Dou, Y. Huang and H. Liu, *J. Mater. Chem. A*, 2017, **5**, 12073-12079.
- 17 H.-g. Wang, C. Yuan, R. Zhou, Q. Duan and Y. Li, *Chem. Eng. J.*, 2017, **316**, 1004-1010.
- 18 D. Su, M. Huang, J. Zhang, X. Guo, J. Chen, Y. Xue, A. Yuan and Q. Kong, *Nano Res.*, 2020, DOI: 10.1007/s12274-020-2944-0.
- 19 M. Yu, Z. Yin, G. Yan, Z. Wang, H. Guo, G. Li, Y. Liu, L. Li and J. Wang, *J. Power Sources*, 2020, **449**, 227514.
- 20 Q. Sun, Z. Cao, S. Wang, L. Sun, L. Zhou, H. Xue, Y. Wu, L. Cavallo, L. Wang and J. Ming, *J. Power Sources*, 2020, **461**, 228128.
- 21 H. Xie, Z. Wu, Z. Wang, N. Qin, Y. Li, Y. Cao and Z. Lu, *J. Mater. Chem. A*, 2020, **8**, 3606-3612.
- 22 J. Yan, W. Li, P. Feng, R. Wang, M. Jiang, J. Han, S. Cao, K. Wang and K. Jiang, *J. Mater. Chem. A*, 2020, **8**, 422-432.
- 23 T. Li, Z. Liu, Y. Gu, Y. Tang and F. Huang, *J. Alloys Compd.*, 2020, **817**, 152703.
- 24 S. Alvin, C. Chandra and J. Kim, *Chem. Eng. J.*, 2020, **391**, 123576.
- 25 C. Li, Y. Sun, Q. Wu, X. Liang, C. Chen and H. Xiang, *Chem. Commun.*, 2020, **56**, 6078-6081.
- 26 H. Wang, H. Yuan, W. Zhan, Y.-S. Lee, H.-J. Shin, X. Wei, Q. Cai, J.-L. Lan, Y. Yu and X. Yang, *Carbon*, 2020, **165**, 204-215.
- 27 X. Lin, Y. Liu, H. Tan and B. Zhang, *Carbon*, 2020, **157**, 316-323.
- 28 Q. Jin, W. Li, K. Wang, H. Li, P. Feng, Z. Zhang, W. Wang and K. Jiang, *Adv. Funct. Mater.*, 2020, **30**, 1909907.
- 29 J. Tzadikov, N. R. Levy, L. Abisdris, R. Cohen, M. Weitman, I. Kaminker, A. Goldbourt, Y. Ein-Eli and M. Shalom, *Adv. Funct. Mater.*, 2020, **30**, 2000592.
- 30 X. Jian, H. Wang, G. Rao, L. Jiang, H. Wang, C. M. Subramaniam, A. Mahmood, W. Zhang, Y. Xiang, S. X. Dou, Z. Zhou, D. Hui, K. Kalantar-Zadeh and N. Mahmood, *Chem. Eng. J.*, 2019, **364**, 578-588.
- 31 X. Miao, D. Sun, X. Zhou and Z. Lei, *Chem. Eng. J.*, 2019, **364**, 208-216.
- 32 F. Sun, K. Wang, L. Wang, T. Pei, J. Gao, G. Zhao and Y. Lu, *Carbon*, 2019, **155**, 166-175.
